## **Exaggerated cytokine production in human peripheral blood mononuclear cells by recombinant SARS-CoV-2 spike glycoprotein S1 and its inhibition by dexamethasone**

Olumayokun A Olajide\*, Victoria U Iwuanyanwu, Izabela Lepiarz-Raba<sup>#</sup>, Alaa A Al-Hindawi

Department of Pharmacy, School of Applied Sciences, University of Huddersfield, Queensgate, Huddersfield HD1 3DH, United Kingdom

<sup>#</sup> Current Address: BRAINCITY-EMBL-Nencki Center of Excellence for Neuronal Plasticity and Brain Disorders, Nencki Institute of Experimental Biology, Warsaw, Poland

### **\*Address for correspondence**

Olumayokun A Olajide, PhD

Email: [o.a.olajide@hud.ac.uk](mailto:o.a.olajide@hud.ac.uk)

## Abstract

An understanding of the pathological inflammatory mechanisms involved in SARS-CoV-2 virus infection is necessary in order to discover new molecular pharmacological targets for SARS-CoV-2 spike glycoprotein. In this study, the effects of a recombinant SARS-CoV-2 spike glycoprotein S1 was investigated in human peripheral blood mononuclear cells (PBMCs). Stimulation with spike glycoprotein S1 (100 ng/mL) resulted in significant elevation in the production of TNF $\alpha$ , IL-6, IL-1 $\beta$  and IL-8. However, pre-treatment with dexamethasone (100 nM) caused a significant reduction in the release of these cytokines. Further experiments revealed that S1 stimulation of PBMCs increased phosphorylation of NF- $\kappa$ B p65 and I $\kappa$ B $\alpha$ , while increasing I $\kappa$ B $\alpha$  degradation. DNA binding of NF- $\kappa$ B p65 was also significantly increased following stimulation with S1. Treatment of PBMCs with dexamethasone (100 nM) or BAY11-7082 (1  $\mu$ M) resulted in inhibition of S1-induced NF- $\kappa$ B activation. Activation of p38 MAPK by S1 was blocked in the presence of dexamethasone and SKF 86002. CRID3, but not dexamethasone pre-treatment produced significant inhibition of S1-induced activation of NLRP3/caspase-1. Further experiments revealed that S1-induced increase in the production of TNF $\alpha$ , IL-6, IL-1 $\beta$  and IL-8 was reduced in the presence of BAY11-7082 and SKF 86002, while CRID3 pre-treatment resulted in the reduction of IL-1 $\beta$  production. These results suggest that SARS-CoV-2 spike glycoprotein S1 stimulate PBMCs to release pro-inflammatory cytokines through mechanisms involving activation of NF- $\kappa$ B, p38 MAPK and NLRP3 inflammasome. It is proposed that clinical benefits of dexamethasone in COVID-19 is possibly due to its anti-inflammatory activity in reducing SARS-CoV-2 cytokine storm.

## **Keywords**

SARS-CoV-2 cytokine storm; SARS-CoV-2 spike glycoprotein S1; Inflammation;  
NF- $\kappa$ B, PBMCs

# 1. Introduction

The severe acute respiratory syndrome coronavirus 2 (SARS-CoV-2) emerged in China in December 2019. Since the first report of its emergence, there has been a global spread of the infection accompanied by widespread appearance of coronavirus disease 2019 (COVID-19) [1, 2]. As of 2<sup>nd</sup> February 2021, there were 102,817,575 confirmed cases and 2,227,420 confirmed deaths globally, and high numbers of new cases are occurring daily [3].

Symptoms of illness caused by SARS-CoV-2 infection at onset of illness are fever, cough, myalgia or fatigue, headache, dyspnoea and pneumonia, while the major complications identified were acute respiratory distress syndrome, cardiac injury and secondary infection [4]. Among these symptoms and complications, end organ damage and acute respiratory distress syndrome (ARDS) have been proposed to be the leading causes of death in critically ill patients [5]. This is not surprising as studies have suggested that excessive release of inflammatory mediators results in cytokine storm, which has been implicated in both ARDS and multi-organ failure [6-8].

Clinical evidence has proposed that the cytokine storm involves a vicious cycle of inflammatory responses which are characterised by the excessive release of pro-inflammatory cytokines including interleukin-1 (IL-1), interleukin-6 (IL-6), interleukin-12 (IL-12), interferon gamma (IFN $\gamma$ ), tumour necrosis factor (TNF $\alpha$ ), all of which target lung tissues [6, 9, 10]. During the pulmonary phase of SARS-CoV-2 infection, the virus infects the upper and lower respiratory tracts using angiotensin-converting enzyme 2 (ACE2) as the receptor for host entry [8]. However, in the pro-inflammatory phase, SARS-CoV-2 activates the host's immune system to trigger both adaptive and innate immune responses [11-13]. The resulting macrophage-mediated hyperactive immune response and stimulation of inflammatory cytokines results in acute lung injury, ARDS, systemic inflammatory response syndrome (SIRS), shock and multiorgan dysfunction [14, 15].

Viral attachment, fusion and entry into the host's cells during SARS-CoV-2 infection are known to be facilitated by the spike glycoproteins which protrude from the surface of mature virions, which bind to the host ACE2 protein [16, 17]. Studies have further shown that in addition to facilitating its fusion to the cell membrane, the

location of the S glycoprotein on SARS-CoV-2 also makes it a direct target for host immune responses [16]. Of the two sub-units of the S glycoprotein, S1 and S2 the receptor-binding domain (RBD) of S1 is the main sub-unit of the spike protein for ACE2 binding. It is therefore hypothesised that the SARS-CoV-2 glycoprotein S1 triggers exaggerated response in immune cells to induce cytokine storm.

It has been widely suggested that macrophages/monocytes are immune cells which play significant roles in SARS-CoV-2-mediated cytokine storm. However, there is limited experimental data highlighting the mechanisms involved in the inflammatory responses by these cells during SARS-CoV-2 cytokine storm. Furthermore, there is a need to develop cellular pharmacological models for investigating anti-inflammatory drugs and novel compounds as adjuncts to treat immune cell-mediated cytokine storm in SARS-CoV-2 infection.

In this study, we have evaluated the effects of stimulating human peripheral blood mononuclear cells (PBMCs) with a recombinant human SARS-CoV-2 spike glycoprotein S1. We have further evaluated the effects of the anti-inflammatory drug, dexamethasone on SARS-CoV-2 spike glycoprotein S1-induced inflammation in PBMCs.

## **2. Materials and methods**

### **2.1 Materials**

Recombinant human coronavirus SARS-CoV-2 spike glycoprotein S1 (ab273068; Lots GR3356031-1 and 3353172-2; Accession [MN908947](#)) was purchased from Abcam. The protein was reconstituted in sterile water for functional studies. The following drugs were used: BAY11-7082 (Sigma), CRID3 sodium salt (Tocris), SKF 86002 dihydrochloride (Tocris) and dexamethasone (Sigma).

### **2.2 Cell culture**

Human peripheral blood mononuclear cells (hPBMCs) (Lonza Biosciences; Catalogue #: 4W-270; Batch: 3038013) were isolated from peripheral blood by apheresis and density gradient separation. Frozen cells were thawed, and transferred to a sterile centrifuge tube. Thereafter, warmed RPMI medium was added to the cells slowly, allowing gentle mixing. The cell suspension was then centrifuged at 400 x g for 10 min. After centrifuging, the supernatant was discarded

and fresh warmed RPMI was added to the pellet. This was followed by another centrifugation at 400 x g for 10 min. Supernatant was removed and cells were suspended in RPMI, counted and allowed to rest overnight.

## **2.3 Production of pro-inflammatory cytokines**

Human PBMCs were seeded out in 24-well plate at  $5 \times 10^4$  cells/mL and treated with S1 (10, 50 and 100 ng/mL) for 24 h. Thereafter, medium was collected and centrifuged to obtain culture supernatants. Experiments were also carried out in cells pre-treated with dexamethasone (1, 10 and 100 ng/ml) for 1 h prior to stimulation with spike glycoprotein S1 (100 ng/ml) for a further 24 h. Levels of  $\text{TNF}\alpha$  in the supernatants were determined using human ELISA™ kit (Abcam). Concentrations of  $\text{TNF}\alpha$  in supernatants were calculated from a mouse  $\text{TNF}\alpha$  standard curve, and the assay range was 15.63-1000 pg/mL. Levels of IL-6 in supernatants were determined using human IL-6 ELISA kit (Abcam). The range for IL-6 detection was 7.8-500 pg/mL. Similarly, levels of IL-1 $\beta$  were evaluated using human IL-1 $\beta$  ELISA kit (Abcam), with a range of detection of 14.06-900 pg/mL, while IL-8 production was evaluated using human IL-8 ELISA kit (Thermo Scientific), with assay range of 2-250 pg/mL.

## **2.4 In cell western (cytoblot) analyses**

The in cell western is a proven method for the rapid quantification of proteins in cells [18, 19]. PBMCs were seeded into a black 96-well plate at  $5 \times 10^4$  cells/mL. At 70% confluence, cells were stimulated with spike glycoprotein S1 (100 ng/ml) for different periods. At the end of each experiment, cells were fixed with 8% paraformaldehyde solution (100  $\mu$ L) for 15 min., followed by washing with PBS. The cells were then incubated with primary antibodies overnight at 4°C. The following antibodies were used: rabbit anti-phospho-p65 (Cell Signalling Technology), rabbit anti-phospho-I $\kappa$ B $\alpha$  (Santa Cruz Biotechnology), rabbit total I $\kappa$ B $\alpha$  (Santa Cruz Biotechnology), rabbit anti-phospho-p38 (Cell Signalling Technology) and rabbit anti-NLRP3 (Abcam) antibodies. Thereafter, cells were washed with PBS and incubated with anti-rabbit HRP secondary antibody for 2 h at room temperature. Then, 100  $\mu$ L HRP substrate was added to each well and absorbance measured at 450nm with a Tecan Infinite M microplate reader. Readings were normalised with Janus Green normalisation stain (Abcam).

## **2.5 NF- $\kappa$ B p65 transcription factor binding assay**

The NF- $\kappa$ B p65 transcription factor assay is a non-radioactive ELISA-based assay for evaluating DNA binding activity of NF- $\kappa$ B in nuclear extracts. PBMCs were seeded in a 6-well plate at a density of  $4 \times 10^4$  cells/mL. The cells were then incubated with 100 ng/mL of spike glycoprotein S1 protein with or without dexamethasone (100 nM) or BAY11-7082 (1  $\mu$ M) for 60 min. At the end of the incubation, nuclear extracts were prepared from the cells and subjected to NF- $\kappa$ B transcription factor binding assay according to the instructions of the manufacturer (Abcam).

## **2.6 Caspase-Glo<sup>®</sup>1 inflammasome assay**

The caspase-Glo<sup>®</sup>1 inflammasome assay (Promega) was used to measure the activity of caspase-1 directly in live cells or culture supernatants. PBMCs were seeded out in 24-well plate at a density of  $4 \times 10^4$  cells/mL and pre-treated with dexamethasone (100 nM) or CRID3 (1  $\mu$ M) for 60 min prior to stimulation with spike glycoprotein S1 (100 ng/mL) for 6 h. After stimulation, cell culture supernatants were collected and mixed with equal volume of Caspase-Glo<sup>®</sup> 1 reagent or Caspase-Glo<sup>®</sup> 1 Reagent + YVAD-CHO (1  $\mu$ M) in a 96-well plate. The contents of the wells were mixed using a plate shaker at 400 rpm for 30 seconds. The plate was then incubated at room temperature for 60 min, followed by luminescent measurement of caspase-1 activity with a FLUOstar OPTIM reader (BMG LABTECH).

## **2.7 Human NLRP3 ELISA**

PBMCs were seeded out into a 6-well plate and allowed to settle overnight. Thereafter, cells were stimulated with spike protein S1 (100 ng/mL) in the presence or absence of dexamethasone (100 nM) or CRID3 (1  $\mu$ M) for 6 h. Cell lysates were prepared by centrifugation at 2000 x g for 7 min at 4°C. The supernatant was discarded and the cells washed in ice-cold PBS by centrifuging at 2000 x g for 7 min at 4°C. Thereafter, ice-cold lysis buffer was added to the cell pellet, followed by sonication for 30 min, and centrifugation at 16000 x g for 20 min at 4°C. Supernatants were collected and analysed for levels of NLRP3 protein using human NLRP3 ELISA kit (Abcam), according to the manufacturer's instructions.

## **2.8 Effects of NF- $\kappa$ B, p38, and NLRP3 inhibitors on cytokine production**

PBMCs were seeded out in 24-well plate at  $5 \times 10^4$  cells/mL and treated with BAY-11-7082 (1  $\mu$ M), SKF 86002 (1  $\mu$ M), or CRDI3 (1  $\mu$ M). One hour later, cells were stimulated with S1 protein (100 ng/mL) for a further 24 h. Culture media were collected and supernatants analysed for levels of TNF $\alpha$ , IL-6, IL-1 $\beta$  and IL-8 as described above.

## **2.9 Co-culture of human A549 epithelial cells and PBMCs**

Human A549 lung epithelial cells were co-cultured with PBMCs using the transwell system (0.4  $\mu$ m porous membrane; Corning). A549 cells were cultured in inserts that constituted the upper chamber until 70% confluent. Thereafter, they were incubated with S1 protein (100 ng/mL) with or without dexamethasone (100 nM) pre-treatment. One hour after the initiation of stimulation with S1 protein, the inserts were placed on overnight-rested PBMCs in the lower chamber for a further 24 h. At the end of the experiment, supernatants were collected from the PBMC layer and analysed for levels of TNF $\alpha$ , IL-6, IL-1 $\beta$  and IL-8 using human ELISA kits as described above.

## **2.10 Statistical analysis**

Data are expressed as mean  $\pm$  SEM for at least three independent experiments (n=3) and analysed using one-way analysis of variance (ANOVA) with post hoc Tukey's test. Statistical analysis were conducted using the GraphPad Prism software.

# **3. Results**

## **3.1 Stimulation of PBMCs with spike protein S1 resulted in increased production of TNF $\alpha$ , IL-6, IL-1 $\beta$ and IL-8**

Following incubation of spike protein S1 (10 ng/mL) with PBMCs for 24 h, analyses of cell supernatants showed no significant ( $p < 0.05$ ) increase in the release of TNF $\alpha$ . On increasing the concentration of the spike protein to 50 and 100 ng/mL, there was ~10 and ~24-fold increase in TNF $\alpha$  secretion, respectively (Figure 1A). Similarly, analyses of supernatants for levels of IL-6 (Figure 1B), IL-1 $\beta$  (Figure 1C) and IL-8 (Figure 1D) revealed that incubation with 10 ng/mL of spike protein S1 did not induce significant elevation in the production of the cytokines, while significant ( $p < 0.05$ )



increases were demonstrated in cells incubated with 50 and 100 ng/mL of the protein.

### **3.2 Increased production of pro-inflammatory mediators by S1 is reduced by dexamethasone**

We next evaluated effects of dexamethasone (1, 10 and 100 nM) on excessive production of pro-inflammatory cytokines in PBMCs stimulated with spike protein S1 (100 ng/mL) for 24 h. Results in Figure 2A show that pre-treatment with 1 nM of dexamethasone did not prevent S1-induced production of TNF $\alpha$ . On increasing the concentration of dexamethasone to 10 nM, there was a weak but insignificant ( $p < 0.05$ ) reduction in TNF $\alpha$  production. On pre-treating the cells with 100 nM of dexamethasone, a significant ( $p < 0.05$ ) reduction in S1-induced increased production of TNF $\alpha$  was observed.

Figure 2B shows that anti-inflammatory effect of dexamethasone on S1-induced exaggerated production of IL-6 in PBMCs was significantly reduced ( $p < 0.05$ ) by pre-treatment with 100 nM, but not the lower concentrations (10 and 50 nM) of the drug. Furthermore, analyses of samples obtained from PBMCs pre-treated with dexamethasone (1 nM) revealed no reduction in the production of IL-1 $\beta$ . However, pre-treatment with 10 and 100 nM of the drug resulted in significant ( $p < 0.001$ ) reduction in IL-1 $\beta$  production (Figure 2C).

Similarly, stimulation of PBMCs with S1 (100 ng/mL) for 24 h resulted in ~14-fold increase in the production of IL-8. This increase was not reduced by 1 and 10 nM of dexamethasone, while increasing drug concentration to 100 nM resulted in ~59% production of IL-8, when compared to S1 stimulation alone (100%) (Figure 2D).

### **3.3 Effects of spike protein S1 on NF- $\kappa$ B activation in PBMCs**

Based on results showing that spike protein S1 stimulates PBMCs to induce increased production of pro-inflammatory cytokines, and the inhibition of this action by dexamethasone, we investigated the roles of NF- $\kappa$ B activation in these actions. Firstly, we used in cell western assays to evaluate the effects of S1 stimulation on protein expression of phospho-p65, phospho-I $\kappa$ B $\alpha$  and total I $\kappa$ B $\alpha$  in the presence and absence of dexamethasone and BAY-11-7082. Results in Figure 3A show that following stimulation of PBMCs with S1 (100 ng/mL) for 15 min, there was ~12.7-fold increase ( $p < 0.001$ ) in protein expression of phospho-p65. Pre-treatment of PBMCs

with dexamethasone (100 nM) and BAY-11-7082 (1  $\mu$ M) for 60 min prior to stimulation with S1 resulted in significant ( $p<0.05$ ) inhibition of p65 phosphorylation. Similarly, significant ( $p<0.001$ ) spike protein S1-induced increase in phospho-I $\kappa$ B $\alpha$  and decrease in total I $\kappa$ B $\alpha$  protein levels were prevented by pre-treatment with dexamethasone (100 nM) and BAY-11-7082 (1  $\mu$ M) (Figures 3B and 3C).

Based on our results showing that spike protein S1 activates the processes resulting in translocation of NF- $\kappa$ B to the nucleus, we next asked whether the protein had any effect on DNA binding by NF- $\kappa$ B. Figure 3D illustrates an increase in DNA binding of NF- $\kappa$ B following stimulation of PBMCs with S1 (100 ng/mL) for 60 min, when compared with unstimulated cells. On the other hand, incubating the cells with either dexamethasone (100 nM) or BAY11-7082 (1  $\mu$ M) for 60 min prior to stimulation with S1 resulted in significant ( $p<0.001$ ) inhibition in DNA binding by NF- $\kappa$ B. These results indicate that dexamethasone and BAY11-7082 inhibited DNA binding by ~46% and ~60%, respectively in comparison with S1 stimulation alone.

### **3.4 Activation of p38 MAPK by spike glycoprotein S1**

In cell western blot analyses revealed that stimulation of PBMCs with S1 (100 ng/mL) for 60 min resulted in a significant ( $p<0.0001$ ) increase in phospho-p38 protein, when compared with unstimulated cells. In comparison with S1 stimulation alone (100% expression), pre-treatment with dexamethasone (100 nM) resulted in ~61.9% expression of phospho-p38 protein, while expression in cells pre-treated with SKF 86002 (1  $\mu$ M) was ~27.2% (Figure 4).

### **3.5 NLRP3 inflammasome/caspase-1 was activated by S1**

We previously showed that S1 induced an increase in IL-1 $\beta$  production in PBMCs. We next asked whether activation of NLRP3 inflammasome/caspase-1 pathway contributed to this increase. Results of ELISA and in-cell western assay in Figures 5A and 5B show that following stimulation with S1 (100 ng/ml) for 6 h, there was a significant ( $p<0.01$ ) increase in protein levels of NLRP3, in comparison with untreated control cells. It was further shown that S1-induced elevation of NLRP3 was significantly reduced in the presence of CRID3 (1  $\mu$ M), while pre-treatment with dexamethasone (100 nM) produced a slight and insignificant ( $p<0.05$ ) reduction in S1-induced increase in NLRP3 protein. Similarly, caspase-1 activity was increased in comparison with untreated PBMCs following stimulation with spike glycoprotein S1

(100 ng/ml). On pre-treating cells with CRID3 prior to S1 stimulation, reduction in caspase-1 activity was observed, while dexamethasone pre-treatment did not have a significant effect on S1-induced increase in caspase-1 activity (Figure 5C).

### **3.6 Effects of BAY11-7082, SKF 86002, SP600125 and CRID3 on SARS-CoV-2 spike protein S1-induced increased production of inflammatory cytokines**

Having demonstrated that spike glycoprotein S1 activates NF- $\kappa$ B, p38, and NLRP3 in PBMCs, we were then interested in establishing the possible roles of these targets in S1-induced exaggerated production of pro-inflammatory cytokines. Results in Figure 6 show that in the presence of BAY11-7082 (1  $\mu$ M), there were significant reductions in elevated secretion of TNF $\alpha$ , IL-6, IL-1 $\beta$  and IL-8 produced when PBMCs were stimulated with spike glycoprotein S1 (100 ng/mL) for 24 h. Similar reduction in S1-induced increased production of the cytokines were observed when cells were pre-treated with SKF 86002 (1  $\mu$ M) prior to S1 stimulation. However, CRID3 (1  $\mu$ M) produced significant ( $p < 0.01$ ) reduction in IL-1 $\beta$  production (Figure 6C), while having no effect on the release of TNF $\alpha$ , IL-6, and IL-8 (Figures 6A, 6B, and 6D).

## **4. Discussion**

The cytokine storm is now established to be a major contributor to fatalities of SARS-CoV-2 infection. Consequently, an understanding of the pathological inflammatory mechanisms involved in SARS-CoV-2 virus infection is necessary in order to discover new molecular pharmacological targets. This study demonstrated that stimulation of human PBMCs with a recombinant spike glycoprotein S1 for 24 hours resulted in significant release of pro-inflammatory cytokines TNF $\alpha$ , IL-6, IL-1 $\beta$  and IL-8. These results appear to explain the increased serum levels of inflammatory cytokines that have been widely reported in patients with severe COVID-19. It is therefore proposed that SARS-CoV-2 infection results in spike protein-mediated activation of monocytes, macrophages and dendritic cells, resulting in positive feedback involving dysregulated production of cytokines.

Several clinical studies have reported that hyper-inflammation, accompanied by increased serum levels of pro-inflammatory cytokines and chemokines are associated with disease severity and death in COVID-19 [14, 20-22]. In fact, post-mortem analyses have revealed that high levels of pro-inflammatory cytokines are

associated with cellular infiltration of organs such as the lungs, heart, and kidney [14, 23-24]. Furthermore, in a study reported by Han et al., cytokine storm characterised by increased serum levels of TNF $\alpha$  and IL-6 were observed and suggested to be predictive of disease severity [25]. Similarly, a retrospective observational study in hospitalised patients diagnosed with COVID-19 showed that serum levels of IL-6 greater than 30 pg/mL was a predictor of invasive mechanical ventilation requirement [26]. It is noteworthy that a similar pattern of cytokine storm was observed in preceding outbreaks such as MERS-CoV and SARS-CoV [27-30]. Pharmacological modulation of cytokine hypersecretion in coronavirus infections warrants further investigation due to fatalities involving multi-organ damage.

Dexamethasone is a corticosteroid employed in a wide range of conditions due to its anti-inflammatory and immunosuppressant activities. However, emerging evidence suggests that dexamethasone may provide some benefits in the treatment of COVID-19. In a controlled, open-label trial conducted by the RECOVERY group, dexamethasone treatment resulted in lower 28-day mortality among COVID-19 patients who were receiving either invasive mechanical ventilation or oxygen alone [31]. Results of the CoDEX clinical trial also show that in COVID-19 with moderate or severe ARDS, the use of intravenous dexamethasone plus standard care resulted in significant improvement in clinical outcome, in comparison with standard care alone [32].

We therefore hypothesised that the benefits of dexamethasone in treating patients with COVID-19 may be due in part to its anti-inflammatory effect through reduction in exaggerated cytokine production at the cellular level. To prove this hypothesis, we showed that treatment with dexamethasone prevented increased production of TNF $\alpha$ , IL-6, IL-1 $\beta$  and IL-8 in PBMCs stimulated with recombinant SARS-CoV-2 spike glycoprotein S1. It appears dexamethasone blocks cellular pathways that are responsible for exaggerated production of cytokines in monocytes, macrophages and lymphocytes that are recruited following infection by SARS-CoV-2. This anti-inflammatory activity may have contributed to the overall benefits of dexamethasone in both the RECOVERY and CoDEX trials.

Dexamethasone exerts anti-inflammatory partly through targeting the activation of the NF- $\kappa$ B transcription factor. This drug has been shown in many studies to block NF- $\kappa$ B activity in epithelial cells [33], as well as macrophages and monocytes

[34-36]. In this study, dexamethasone inhibited cytoplasmic activation and DNA binding of NF- $\kappa$ B in PBMCs stimulated with SARS-CoV-2 spike glycoprotein S1 suggesting a role for the transcription factor in the observed effects of dexamethasone on inflammatory cytokines. Our results showing a role for NF- $\kappa$ B in a cellular model of SARS-CoV-2-induced inflammation correlate with results of a recent study showing that SARS-CoV-2 infection of human ACE2-transgenic mice resulted in NF- $\kappa$ B-dependent lung inflammation [37]. Results demonstrating inhibition of SARS-CoV-2 spike glycoprotein S1-induced production of pro-inflammatory cytokines by BAY11-7082 further confirmed the direct involvement of NF- $\kappa$ B in their release during SARS-CoV-2 cytokine storm, and warrants further investigation.

Mitogen-activated protein kinases (MAPKs) are protein kinases that regulate various cellular proliferation, differentiation, apoptosis, survival, inflammation, and innate immunity [38, 39]. Specifically, p38 MAPK is activated by bacterial lipopolysaccharide and by pro-inflammatory cytokines, and plays a major role in regulating the production of pro-inflammatory cytokines in inflammation [38-42]. Results showing increased release of pro-inflammatory cytokines by SARS-CoV-2 spike glycoprotein S1 prompted investigations which revealed an activation of p38 MAPK by the protein in PBMCs. It was further established that S1-induced increased cytokine production was inhibited by the p38 MAPK inhibitor, SKF86002. These observations suggest that activation of p38 MAPK is a critical contributor to hypercytokinemia in COVID-19 patients. These findings appear to be consistent with the outcome of recent experiments which showed that infection of the African green monkey kidney epithelial (Vero E6) cells with the SARS-CoV-2 virus resulted in the activation of p38 MAPK [43]. In another study reported by Bouhaddou et al., SARS-CoV-2 activation of p38 MAPK was demonstrated in ACE2-expressing A549 cells, while SARS-CoV-2-induced increase in the production of inflammatory cytokines was inhibited by another p38 inhibitor, SB203580 [44].

While this study confirmed involvement of both NF- $\kappa$ B and p38 MAPK activation in SARS-CoV-2 spike glycoprotein S1-induced exaggerated release of inflammatory cytokines in PBMCs, it is not clear if these were as a result of activation of a critical convergence upstream process in the release of pro-inflammatory cytokines. The SARS-CoV-2 spike glycoprotein S1 is known to interact with the angiotensin-

converting enzyme 2 (ACE2) receptors to gain access to host cells, and has been suggested to induce immune responses. Interestingly, flow cytometry measurements of the human peripheral blood-derived immune cells revealed little or no expression of ACE2, while high expressions were reported in human tissue macrophages, such as alveolar macrophages, liver Kupffer cells, and brain microglia [45]. Other studies have reported expression of ACE2 in alveolar macrophages and human monocyte THP-1 cells [46]. Studies to further determine the roles of ACE2 in spike glycoprotein S1-induced inflammation are therefore needed. The unresolved roles of ACE2 in this respect will stimulate interest in the potential roles of toll-like receptors (TLRs) in the induction of exaggerated cytokine release by SARS-CoV-2 spike glycoprotein S1. Results of observational studies by Sohn et al. [47] revealed that TLR4 and its inflammatory signalling molecules were upregulated in PBMCs from COVID-19 patients, compared with healthy controls. These results, coupled with our data suggest that the SARS-CoV-2 spike glycoprotein S1 appear to be activating NF- $\kappa$ B and p38 MAPK signalling through activation of TLR4.

Our investigations further revealed that the spike protein S1 increased NLRP3 protein expression as well as caspase-1 activity in PBMCs, which may be contributing to the release of IL-1 $\beta$  by these cells. Interestingly, the activation of NLRP3/caspase-1 by S1 was not markedly dexamethasone, showing that the effects of the drug may be more pronounced on NF- $\kappa$ B signalling in these cells. Targeting of the NLRP3 inflammasome activation pathway in macrophages has been suggested as one of the mechanisms involved in SARS-CoV-2 cytokine storm [15, 48]. With data from studies suggesting that the spike protein S1 could be activating TLR4 to cause macrophage-mediated cytokine storm, coupled with our data showing activation of NLRP3 inflammasome by the protein, further investigations need to explore potential roles of TLRs in S1-induced activation of NLRP3 inflammasome, with subsequent increase in the release of pro-inflammatory cytokines.

The studies reported here have shown that the SARS-CoV-2 spike glycoprotein S1 induced exaggerated inflammation in PBMCs through mechanisms involving activation of NF- $\kappa$ B transcription factor, p38 MAPK and the NLRP3 inflammasome. It is proposed that the clinical benefits of dexamethasone in COVID-19 is possibly due to its anti-inflammatory activity in reducing SARS-CoV-2 cytokine storm and subsequent multi-organ failure. It is further proposed that S1-induced production of



cytokines in human peripheral blood mononuclear cells is therefore a potential cellular model to investigate anti-inflammatory compounds for reducing cytokine storm in SARS-CoV-2 infection. Further studies will focus on the possible interactions between the spike protein S1 and toll-like receptors in the activation of innate immunity in macrophages.

### **Conflict of interest**

There are no known conflicts of interest associated with this publication and there has been no financial support for this work that could have influenced its outcome.

### **CRediT author statement**

**Olumayokun A Olajide:** Conceptualisation, Methodology, Investigation, Writing - Original Draft, Writing - Review & Editing, Project administration **Victoria U**

**Iwuanyanwu:** Investigation. **Izabela Lepiarz-Raba:** Investigation. **Alaa Al-Hindawi:** Investigation.

## References

1. Zhu N, Zhang D, Wang W, et al. (2020) A novel coronavirus from patients with pneumonia in China 2019. *N Engl J Med.* 382: 727–733.
2. Zhou P, Yang XL, Wang XG, et al. (2020) A pneumonia outbreak associated with a new coronavirus of probable bat origin. *Nature* 579: 270–273.
3. Novel Coronavirus (2019-nCoV) situation reports - World Health Organization (WHO)
4. Huang C, Wang Y, Li X, et al. (2020) Clinical features of patients infected with 2019 novel coronavirus in Wuhan, China. *Lancet.* 395: 497-506.
5. Moradian N, Gouravani M, Salehi MA, et al. (2020) Cytokine release syndrome: inhibition of pro-inflammatory cytokines as a solution for reducing COVID-19 mortality. *Eur Cytokine Netw.* 31: 81-93.
6. Hirawat R, Saifi MA, Godugu C (2020) Targeting inflammatory cytokine storm to fight against COVID-19 associated severe complications. *Life Sci.* 267: 118923.
7. Yang L, Liu S, Liu J, et al. (2020) COVID-19: immunopathogenesis and Immunotherapeutics. *Signal Transduct Target Ther* 5: 128.
8. Lee C, Choi WJ (2021) Overview of COVID-19 inflammatory pathogenesis from the therapeutic perspective. *Arch Pharm Res.* 4: 1–18.
9. Grifoni E, Valoriani A, Cei F, et al. (2020) Interleukin-6 as prognosticator in patients with COVID-19. *J Infect.* 81: 452–482.
10. Aziz M, Fatima R, Assaly R (2020) Elevated interleukin-6 and severe COVID-19: A meta-analysis. *J Med Virol.* 92: 2283-2285.
11. Ahmed SF, Quadeer AA, McKay MR (2020) Preliminary identification of potential vaccine targets for the COVID-19 Coronavirus (SARS-CoV-2) based on SARS-CoV immunological studies. *Viruses.* 12: 254.
12. Catanzaro M, Fagiani F, Racchi M, Corsini E, Govoni S, Lanni C (2020) Immune response in COVID-19: addressing a pharmacological challenge by targeting pathways triggered by SARS-CoV-2. *Signal Transduct Target Ther.* 5: 84.
13. Giamarellos-Bourboulis EJ, Netea MG, Rovina N et al. (2020) Complex immune dysregulation in COVID-19 patients with severe respiratory failure. *Cell Host Microbe.* 27: 992-1000.e3.
14. Merad M, Martin JC (2020) Pathological inflammation in patients with COVID-19: a key role for monocytes and macrophages. *Nat Rev Immunol.* 20: 355-362.



15. Freeman TL, Swartz TH (2020) Targeting the NLRP3 Inflammasome in Severe COVID-19. *Front Immunol.* 11: 1518.
16. Walls AC, Park YJ, Tortorici MA, Wall A, McGuire AT, Velesler D (2020) Structure, function, and antigenicity of the SARS-CoV-2 spike glycoprotein. *Cell* 181: 281-292.e6
17. Duan L, Zheng Q, Zhang H, Niu Y, Lou Y, Wang H (2020) The SARS-CoV-2 spike glycoprotein biosynthesis, structure, function, and antigenicity: implications for the design of spike-based vaccine immunogens. *Front Immunol* 11: 576622
18. Velagapudi R, Lepiarz I, El-Bakoush A, Katola FO, Bhatia H, Fiebich BL, Olajide OA (2019) Induction of autophagy and activation of SIRT-1 deacetylation mechanisms mediate neuroprotection by the pomegranate metabolite urolithin A in BV2 microglia and differentiated 3D human neural progenitor cells. *Mol Nutr Food Res.* 63: e1801237.
19. Olajide OA, Akande IS, da Silva Maia Bezerra Filho C, Lepiarz-Raba I, de Sousa DP (2020) Methyl 3,4,5-trimethoxycinnamate suppresses inflammation in RAW264.7 macrophages and blocks macrophage-adipocyte interaction. *Inflammopharmacology.* 28: 1315-1326.
20. Chen G, Wu D, Guo W et al. (2020) Clinical and immunological features of severe and moderate coronavirus disease 2019. *J Clin Invest.* 130: 2620-2629.
21. Qin C, Zhou L, Hu Z et al. (2020) Dysregulation of immune response in patients with coronavirus 2019 (COVID-19) in Wuhan, China. *Clin Infect Dis.* 71: 762-768.
22. Gong J, Dong H, Xia QS et al. (2020) Correlation analysis between disease severity and inflammation-related parameters in patients with COVID-19: a retrospective study. *BMC Infect Dis.* 20: 963.
23. Xu Z, Shi L, Wang Y et al. (2020) Pathological findings of COVID-19 associated with acute respiratory distress syndrome. *Lancet Respir Med.* 8: 420-422.
24. Mustafa MI, Abdelmoneim AH, Mahmoud EM, Makhawi AM (2020) Cytokine storm in COVID-19 patients, its impact on organs and potential treatment by QTY code-designed detergent-free chemokine receptors. *Mediators Inflamm.* 2020: 8198963.
25. Han H, Ma Q, Li C et al. (2020) Profiling serum cytokines in COVID-19 patients reveals IL-6 and IL-10 are disease severity predictors. *Emerg Microbes Infect.* 9: 1123-1130.

26. Galván-Román JM, Rodríguez-García SC, Roy-Vallejo E et al. (2021) IL-6 serum levels predict severity and response to tocilizumab in COVID-19: An observational study. *J Allergy Clin Immunol.* 147: 72-80.e8.
27. Mahallawi WH, Khabour OF, Zhang Q, Makhdom HM, Suliman BA (2018) MERS-CoV infection in humans is associated with a pro-inflammatory Th1 and Th17 cytokine profile. *Cytokine.* 104: 8-13.
28. Wong CK, Lam CW, Wu AK et al. (2004) Plasma inflammatory cytokines and chemokines in severe acute respiratory syndrome. *Clin Exp Immunol.* 136: 95-103.
29. Channappanavar R, Perlman S (2017) Pathogenic human coronavirus infections: causes and consequences of cytokine storm and immunopathology. *Semin Immunopathol.* 39: 529-539.
30. Lau SKP, Lau CCY, Chan KH, et al. (2013) Delayed induction of proinflammatory cytokines and suppression of innate antiviral response by the novel Middle East respiratory syndrome coronavirus: implications for pathogenesis and treatment. *J Gen Virol.* 94: 2679-2690.
31. RECOVERY Collaborative Group, Horby P, Lim WS et al. (2020) Dexamethasone in hospitalized patients with Covid-19-preliminary report. *N Engl J Med.* NEJMoa2021436.
32. Tomazini BM, Maia IS, Cavalcanti AB et al. (2020) Effect of dexamethasone on days alive and ventilator-free in patients with moderate or severe acute respiratory distress syndrome and COVID-19: The CoDEX randomized clinical trial. *JAMA.* 324: 1307-1316.
33. Newton R, Hart LA, Stevens DA, Bergmann M, Donnelly LE, Adcock IM, Barnes PJ (1998) Effect of dexamethasone on interleukin-1beta-(IL-1beta)-induced nuclear factor-kappaB (NF-kappaB) and kappaB-dependent transcription in epithelial cells. *Eur J Biochem.* 254: 81-89.
34. Jeon YJ, Han SH, Lee YW, Lee M, Yang KH, Kim HM (2000) Dexamethasone inhibits IL-1 beta gene expression in LPS-stimulated RAW 264.7 cells by blocking NF-kappa B/Rel and AP-1 activation. *Immunopharmacology.* 48: 173-183.
35. Fong CC, Zhang Y, Zhang Q, et al. (2007) Dexamethasone protects RAW264.7 macrophages from growth arrest and apoptosis induced by H2O2 through alteration of gene expression patterns and inhibition of nuclear factor-kappa B (NF-kappaB) activity. *Toxicology.* 236: 16-28.

36. Kim BY, Son Y, Lee J, et al. (2017) Dexamethasone inhibits activation of monocytes/macrophages in a milieu rich in 27-oxygenated cholesterol. *PLoS One*. 12: e0189643.
37. Winkler ES, Bailey AL, Kafai NM et al. (2020) SARS-CoV-2 infection of human ACE2-transgenic mice causes severe lung inflammation and impaired function. *Nat Immunol*. 21: 1327-1335.
38. Arthur JS, Ley SC (2013) Mitogen-activated protein kinases in innate immunity. *Nat Rev Immunol*. 13: 679-692.
39. Kim EK, Choi EJ (2015) Compromised MAPK signaling in human diseases: an update. *Arch Toxicol*. 89: 867-882.
40. Lee JC, Laydon JT, McDonnell PC, et al. (1994) A protein kinase involved in the regulation of inflammatory cytokine biosynthesis. *Nature*. 372: 739-746.
41. Cuenda A, Rousseau S (2007) p38 MAP-kinases pathway regulation, function and role in human diseases. *Biochim Biophys Acta*. 1773: 1358-1375.
42. Sabio G, Davis RJ (2014) TNF and MAP kinase signalling pathways. *Semin Immunol*. 26: 237-245.
43. Ma Q, Pan W, Li R, et al. (2020) Liu Shen capsule shows antiviral and anti-inflammatory abilities against novel coronavirus SARS-CoV-2 via suppression of NF- $\kappa$ B signaling pathway. *Pharmacol Res*. 158: 104850.
44. Bouhaddou M, Memon D, Meyer B, et al. (2020) The global phosphorylation landscape of SARS-CoV-2 infection. *Cell*. 182: 685-712.e19.
45. Song X, Hu W, Yu H, et al. (2020) Little to no expression of angiotensin-converting enzyme-2 on most human peripheral blood immune cells but highly expressed on tissue macrophages. *Cytometry A*. doi: 10.1002/cyto.a.24285.
46. Duan F, Guo L, Yang L, et al. (2020) Modeling COVID-19 with human pluripotent stem cell-derived cells reveals synergistic effects of anti-inflammatory macrophages with ace2 inhibition against SARS-CoV-2. *Res Sq [Preprint]*. rs.3.rs-62758. doi: 10.21203/rs.3.rs-62758/v1.
47. Sohn KM, Lee SG, Kim HJ, et al. (2020) COVID-19 patients upregulate toll-like receptor 4-mediated inflammatory signaling that mimics bacterial sepsis. *J Korean Med Sci*. 35: e343.

48. Rodrigues TS, de Sá KSG, Ishimoto AY, et al. (2021) Inflammasomes are activated in response to SARS-CoV-2 infection and are associated with COVID-19 severity in patients. J Exp Med. 218: e20201707.

## Figure Legends

**Figure 1:** Effects of spike glycoprotein S1 (10, 50 and 100 ng/mL) stimulation on TNF $\alpha$  (A), IL-6 (B), IL-1 $\beta$  (C) and IL-8 (D) production in human PBMCs. Culture supernatants were collected following stimulation for 24 h, and analysed using human ELISA kits for TNF $\alpha$ , IL-6, IL-1 $\beta$  and IL-8. Values are mean  $\pm$  SEM for at least 3 independent experiments (ns: not significant; \* $p$ <0.05; \*\*\* $p$ <0.001; \*\*\*\* $p$ <0.0001, compared with unstimulated control; one-way ANOVA with post-hoc Tukey test).

**Figure 2:** Effects of pre-treatment with dexamethasone (1, 10 and 100 nM) on increased TNF $\alpha$  (A), IL-6 (B), IL-1 $\beta$  (C) and IL-8 (D) production induced by spike glycoprotein S1 (100 ng/mL) in human PBMCs. Culture supernatants were collected following stimulation for 24 h, and analysed using human ELISA kits for TNF $\alpha$ , IL-6, IL-1 $\beta$  and IL-8. Values are mean  $\pm$  SEM for at least 3 independent experiments (ns: not significant; \* $p$ <0.05; \*\* $p$ <0.01; \*\*\* $p$ <0.001; \*\*\*\* $p$ <0.0001, compared with unstimulated control or spike glycoprotein S1 stimulation; one-way ANOVA with post-hoc Tukey test).

**Figure 3:** Spike glycoprotein S1 (100 ng/mL) stimulation of PBMCs activated NF- $\kappa$ B signalling, and was inhibited by dexamethasone (100 nM). In-cell western analyses of PBMCs revealed increased levels of phospho-p65 protein (A), phospho-I $\kappa$ B $\alpha$  (B), and a reduction in total I $\kappa$ B $\alpha$  protein (C) following stimulation for 15 min.

Dexamethasone pre-treatment prevented DNA binding of NF- $\kappa$ B following stimulation with Spike glycoprotein S1 for 60 min (D). Values are mean  $\pm$  SEM for at least 3 independent experiments (\* $p$ <0.05; \*\* $p$ <0.01; \*\*\* $p$ <0.001; \*\*\*\* $p$ <0.0001, compared with unstimulated control or spike glycoprotein S1 stimulation; one-way ANOVA with post-hoc Tukey test).

**Figure 4:** Stimulation of human PBMCs with spike glycoprotein S1 (100 ng/mL) for 60 min activated p38 MAPK, and was inhibited by treatment with dexamethasone (100 nM) or SKF 86002 (1  $\mu$ M). Values are mean  $\pm$  SEM for at least 3 independent experiments (\*\* $p$ <0.01; \*\*\*\* $p$ <0.0001, compared with unstimulated control or spike glycoprotein S1 stimulation; one-way ANOVA with post-hoc Tukey test).

**Figure 5:** Increase in protein expression of NLRP3 inflammasome following stimulation of human PBMCs with spike glycoprotein S1 (100 ng/mL) for 6 h, as

determined using human ELISA for NLRP3 (A) and in-cell western (B). Effects of stimulation with spike glycoprotein S1 on caspase-1 activity (C). Values are mean  $\pm$  SEM for at least 3 independent experiments (ns: not significant; \* $p < 0.05$ ; \*\* $p < 0.01$ , compared with unstimulated control or spike glycoprotein S1 stimulation; one-way ANOVA with post-hoc Tukey test).

**Figure 6:** Effects of pre-treatment with BAY11-7082 (1  $\mu$ M), SKF 86002 (1  $\mu$ M) and CRID3 (1  $\mu$ M) on TNF $\alpha$  (A), IL-6 (B), IL-1 $\beta$  (C) and IL-8 (D) production in human PBMCs. Culture supernatants were collected following stimulation for 24 h, and analysed using human ELISA kits for TNF $\alpha$ , IL-6, IL-1 $\beta$  and IL-8. Values are mean  $\pm$  SEM for at least 3 independent experiments (ns: not significant; ###  $p < 0.001$  versus unstimulated control; ####  $p < 0.0001$  versus unstimulated control; \* $p < 0.05$ ; \*\* $p < 0.01$ ; \*\*\* $p < 0.001$ , compared with spike glycoprotein S1 stimulation; one-way ANOVA with post-hoc Tukey test).

Figure 1

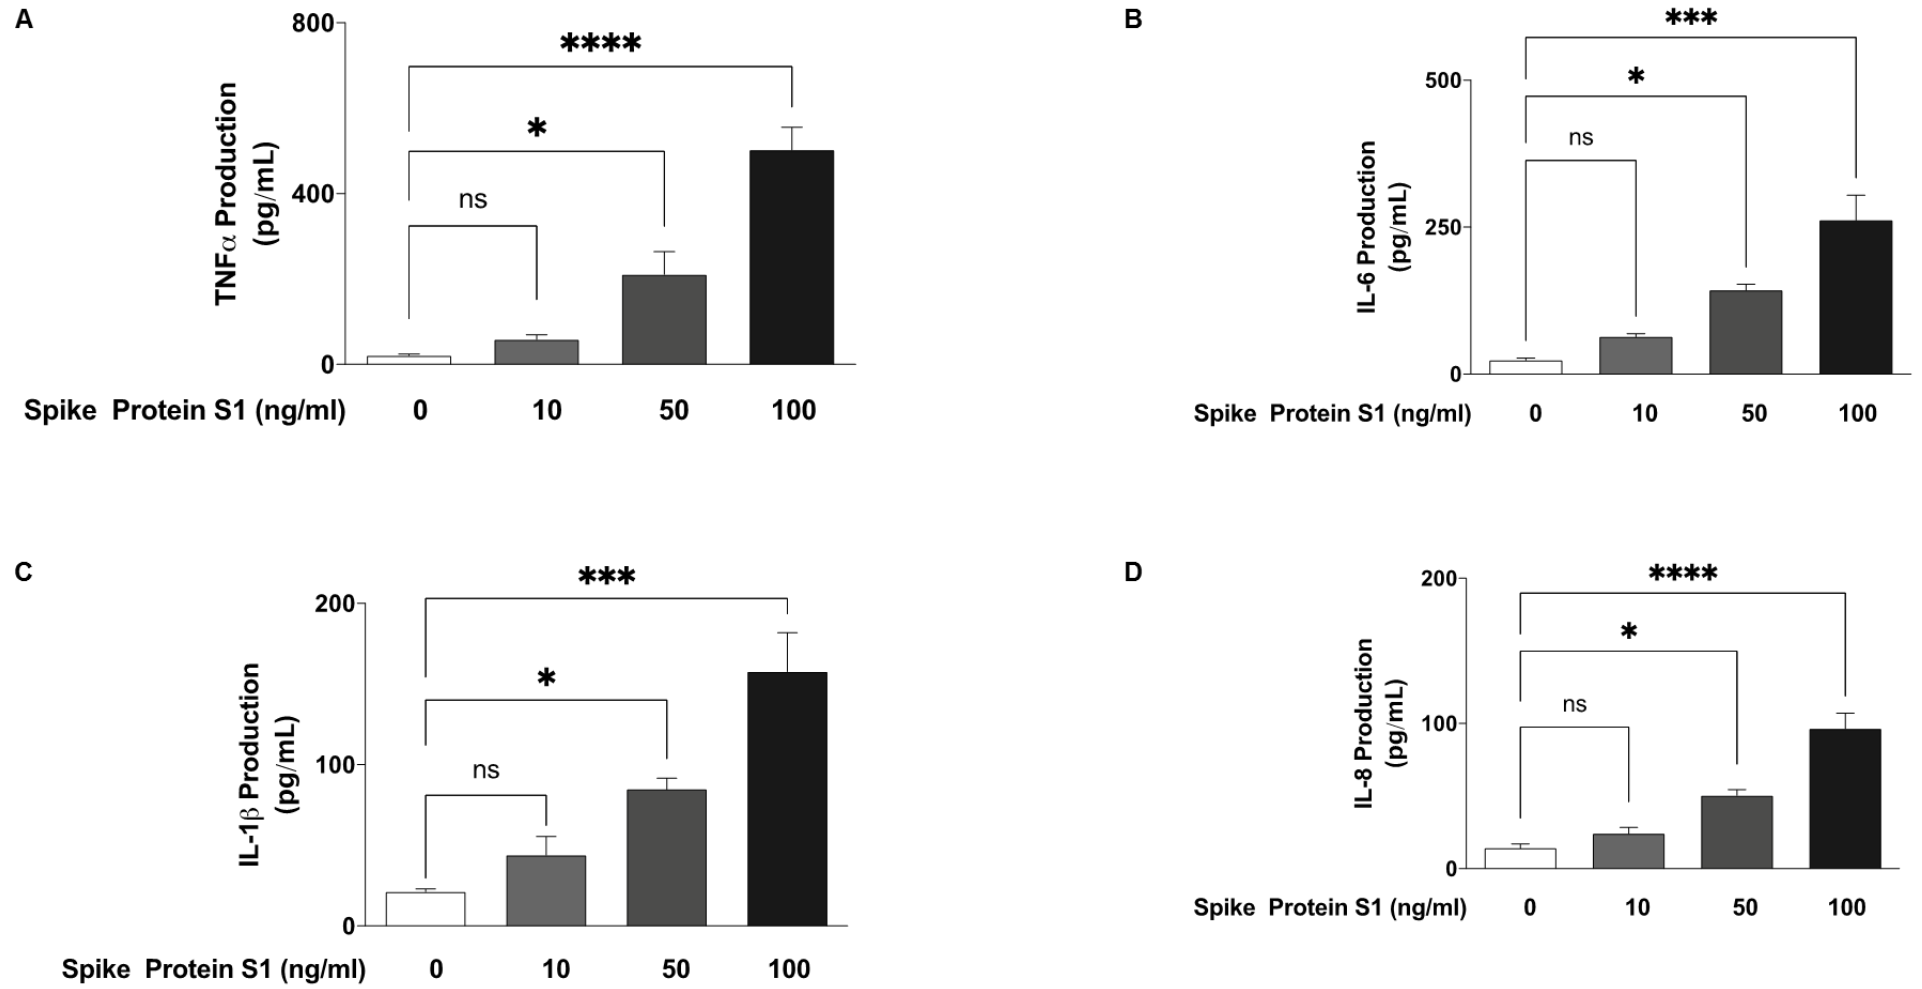

Figure 2

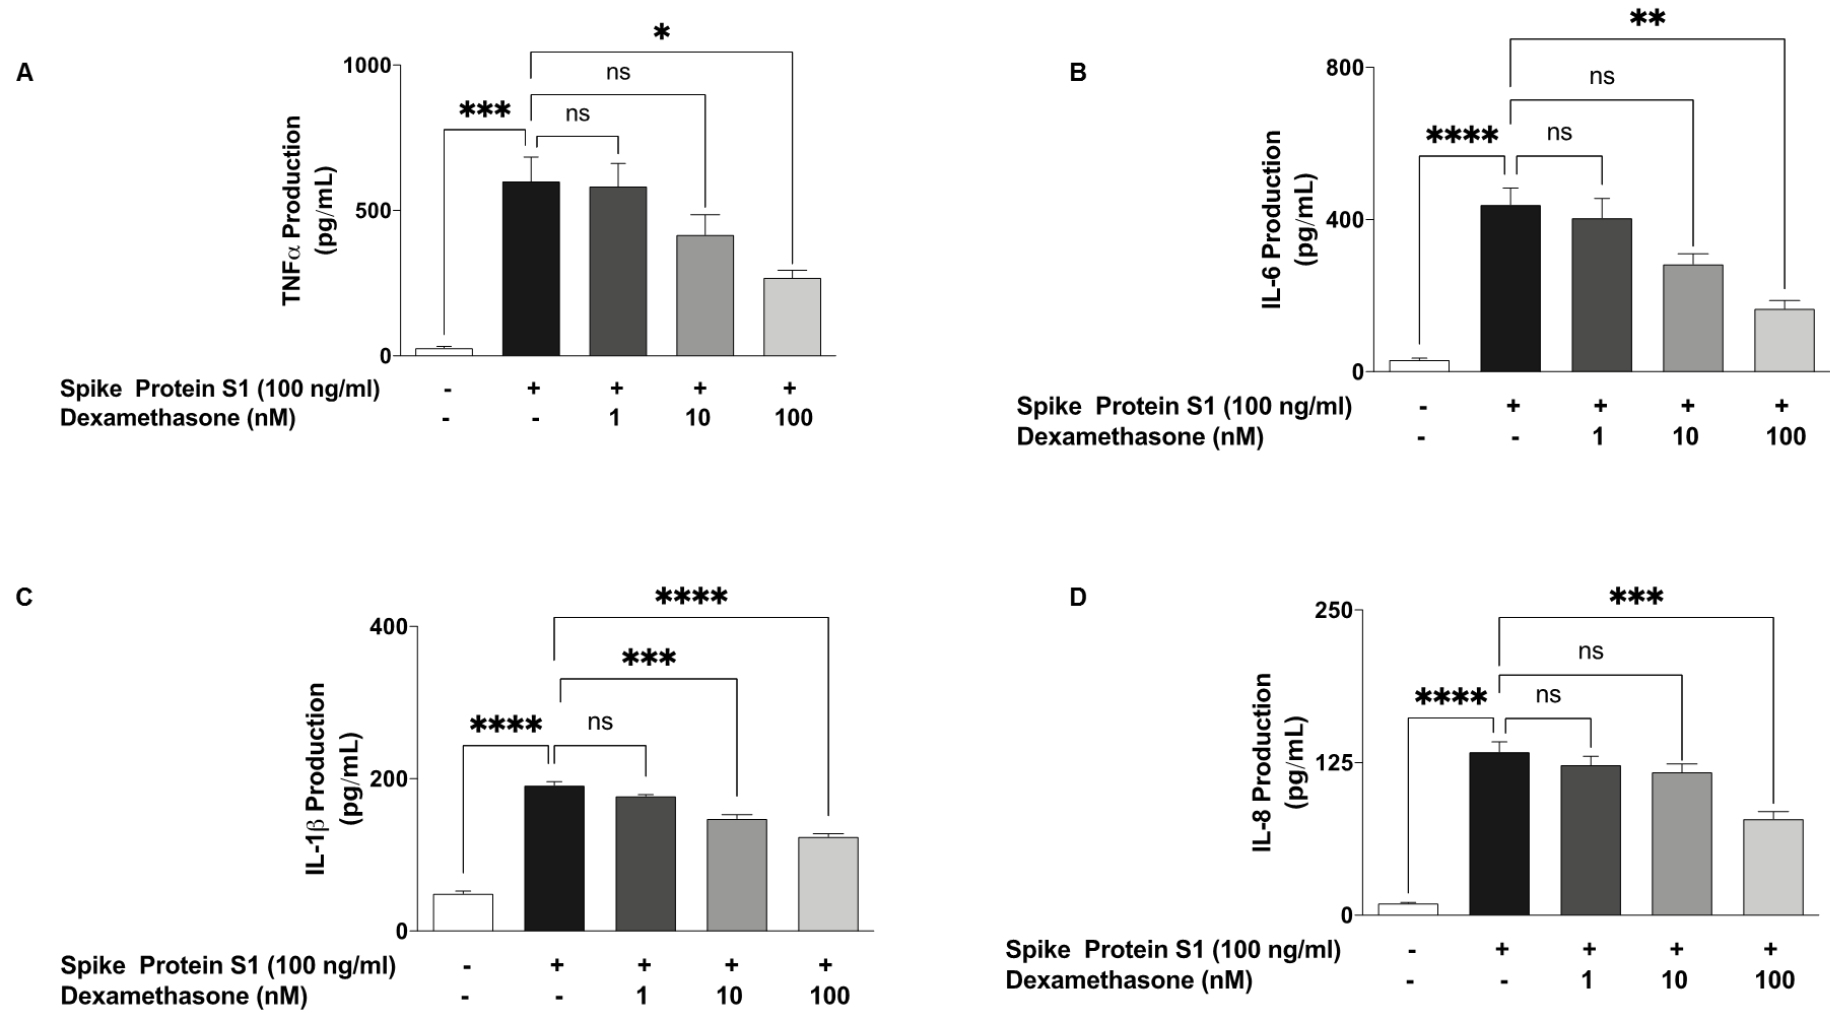



Figure 3

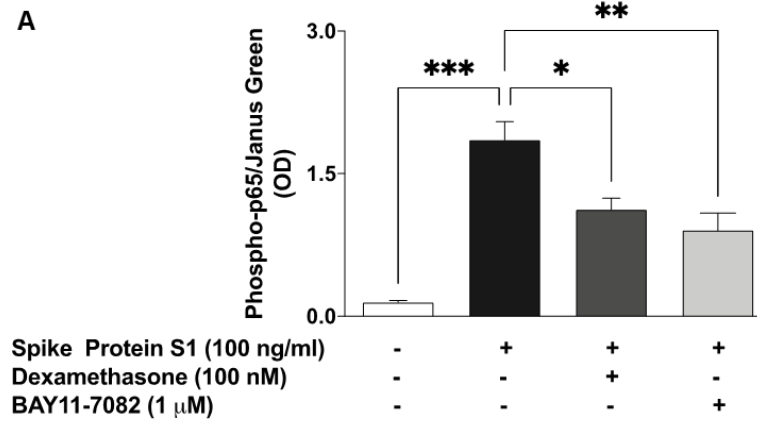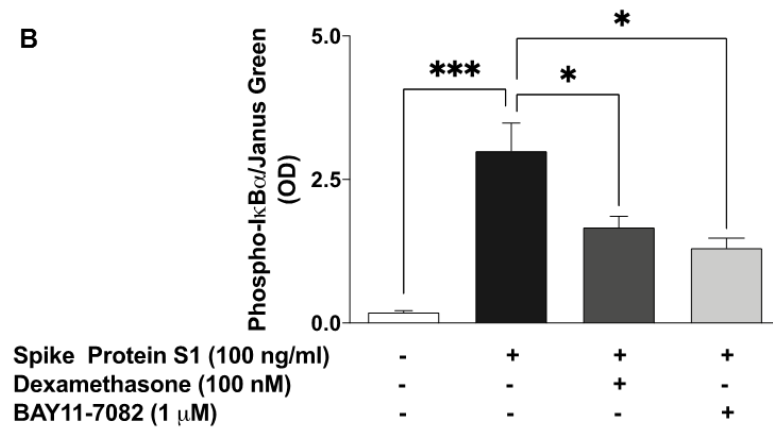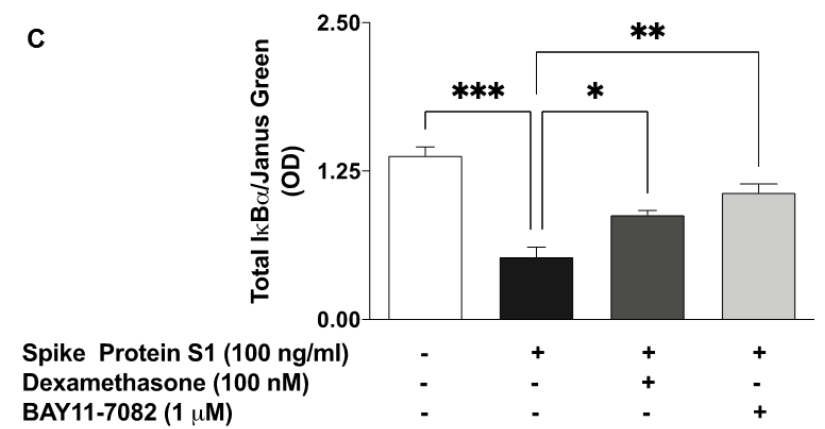

Figure 3

D

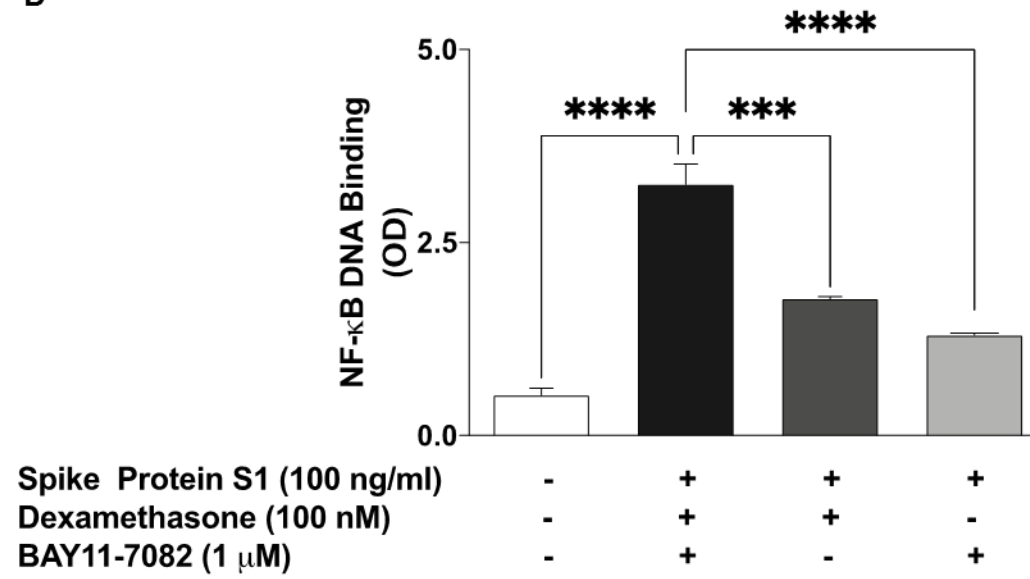

Figure 4

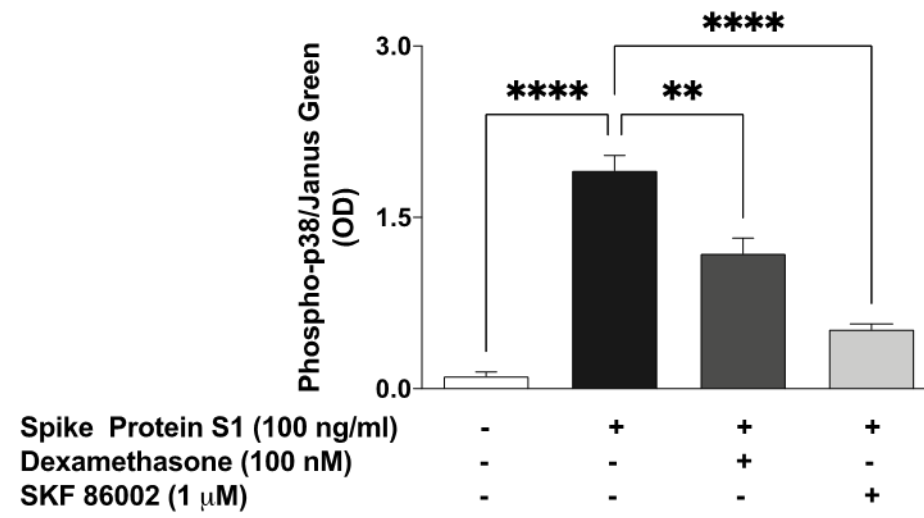

Figure 5

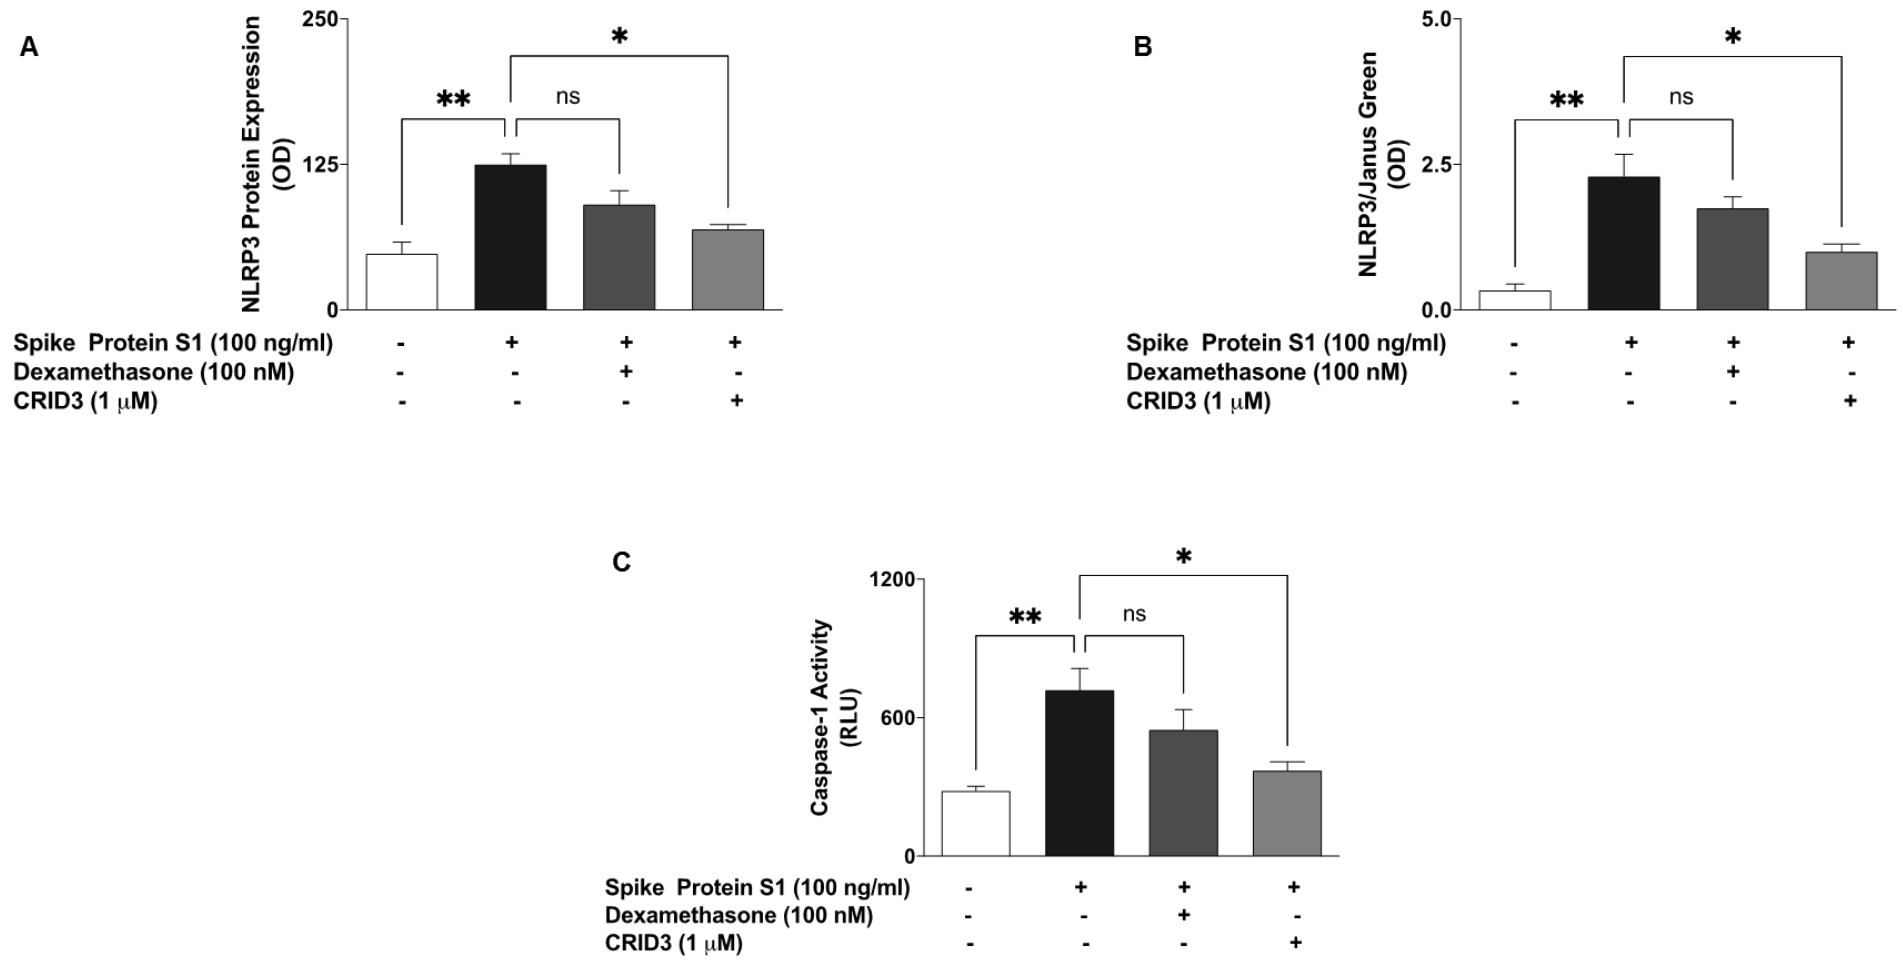

Figure 6

A

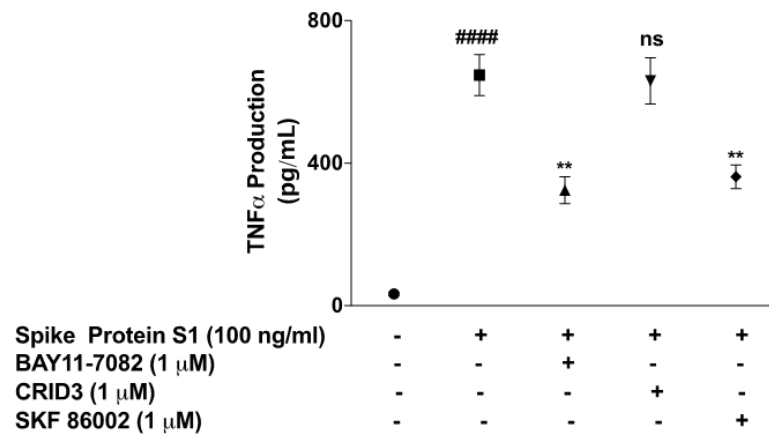

B

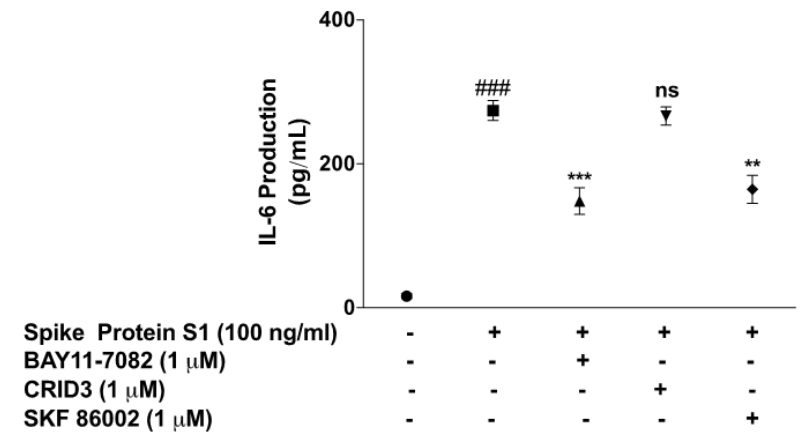

C

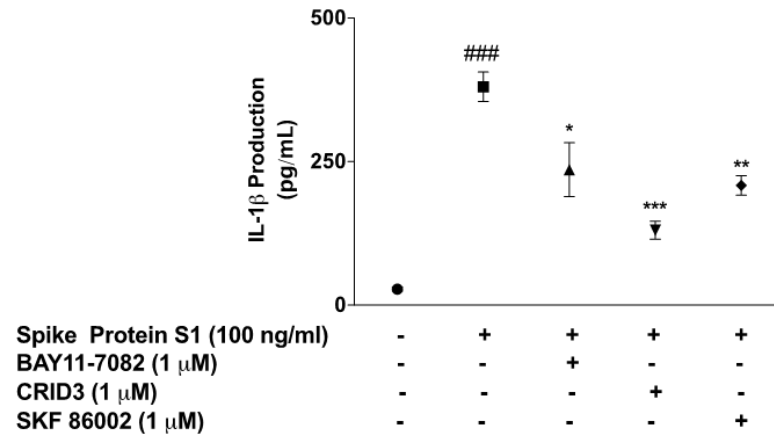

D

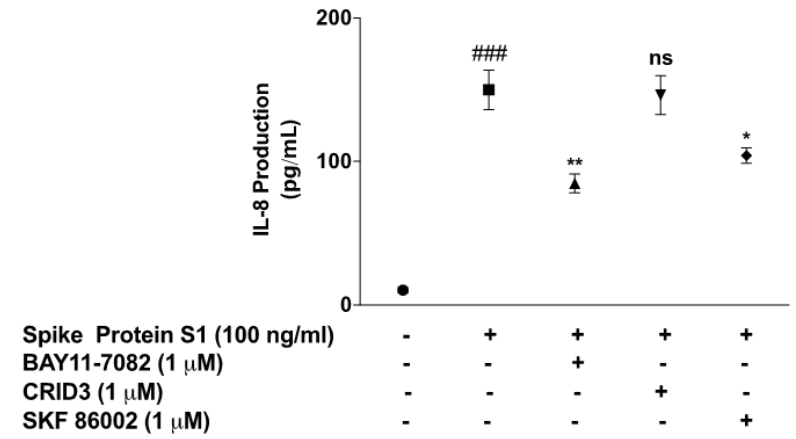

Source: https://www.biorxiv.org/content/10.1101/2021.02.03.429536v1.full.pdf
